## RESEARCH ARTICLE

# Health inequities as measured by the EQ-5D-5L during COVID-19: Results from New York in healthy and diseased persons

Erica I. Lubetkin<sup>1\*</sup>, Di Long<sup>2</sup>, Juanita A. Haagsma<sup>2</sup>, Mathieu F. Janssen<sup>3</sup>, Gouke J. Bonsel<sup>2,4</sup>

**1** Department of Community Health and Social Medicine, CUNY School of Medicine, New York, New York, United States of America, **2** Department of Public Health, Erasmus MC University Medical Center Rotterdam, Rotterdam, The Netherlands, **3** Section Medical Psychology and Psychotherapy, Department of Psychiatry, Erasmus MC, Rotterdam, The Netherlands, **4** EuroQol Research Foundation, Rotterdam, The Netherlands

\* [lubetkin@med.cuny.edu](mailto:lubetkin@med.cuny.edu)

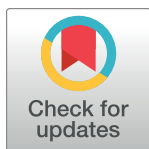

## OPEN ACCESS

**Citation:** Lubetkin EI, Long D, Haagsma JA, Janssen MF, Bonsel GJ (2022) Health inequities as measured by the EQ-5D-5L during COVID-19: Results from New York in healthy and diseased persons. *PLoS ONE* 17(7): e0272252. <https://doi.org/10.1371/journal.pone.0272252>

**Editor:** Sergio A. Useche, Universitat de Valencia, SPAIN

**Received:** April 18, 2021

**Accepted:** July 7, 2022

**Published:** July 28, 2022

**Copyright:** © 2022 Lubetkin et al. This is an open access article distributed under the terms of the [Creative Commons Attribution License](https://creativecommons.org/licenses/by/4.0/), which permits unrestricted use, distribution, and reproduction in any medium, provided the original author and source are credited.

**Data Availability Statement:** Data are available for researchers who meet the criteria for access to data upon request which can be applied at the Data Access Committee of the Public Health Department (e-mail: [secretariaat.mgz@erasmusmc.nl](mailto:secretariaat.mgz@erasmusmc.nl)) under reference number 2022036.

**Funding:** JAH and GJB received the following award. This investigation was sponsored by the EuroQol Research Foundation (Grant Number: 77-2020RA; <https://euroqol.org/euroqol/>). The sponsor did not play any role in study design,

## Abstract

### Introduction

The effects of the COVID-19 pandemic caused considerable psychological and physical effects in healthy and diseased New Yorkers aside from the effects in those who were infected. We investigated the relationship between known risk-enhancing and health-promoting factors (social and medical), comorbidity indicators, and, as the primary outcome, health-related quality of life (HRQoL).

### Methods

Between April 22 and May 5, 2020, a market research agency (Dynata) administered a digital survey including the EQ-5D-5L and items related to individual characteristics, social position, occupational and insurance status, living situation, exposures (smoking and COVID-19), detailed chronic conditions, and experienced access to care to an existing internet panel representative of New Yorkers.

### Results

2684 persons completed the questionnaire. The median age was 48 years old, and most respondents were non-Hispanic white (74%) and reported at least higher vocational training or a university education (83%). During COVID-19, mean HRQoL scores were 0.82 for the EQ-5D-5L index and 79.3 for the EQ VAS. Scores varied for healthy and diseased respondents differently by the above determinants. Lower age, impaired occupational status, loss of health insurance, and limited access to care exerted more influence on EQ-5D-5L scores of diseased persons compared to healthy persons. Among diseased persons, the number of chronic conditions and limited access to health care had the strongest association with EQ-5D-5L scores. While EQ-5D-5L scores improved with increasing age, gender had no noticeable effect. Deprivation factors showed moderate effects, which largely disappeared in (stratified) multivariable analysis, suggesting mediation through excess chronic morbidity

collection, analysis and interpretation of the data, writing the report, and the decision to submit the report for publication.

**Competing interests:** Erica I. Lubetkin, Di Long, and Juanita A. Haagsma have no financial disclosures. Mathieu F. Janssen is working on a freelance basis at the EuroQol Business Office. Gouke J. Bonsel is a part-time employee of the EuroQol Research Foundation. Erica I. Lubetkin, Juanita A. Haagsma, Mathieu F. Janssen, and Gouke J. Bonsel are all members of the EuroQol Group, an international scientific network. This does not alter our adherence to PLOS ONE policies on sharing data and materials.

and poor healthcare access. Generally, modifying effects were larger in the EQ-5D-5L as compared to the EQ VAS.

## Conclusions

Almost all factors relating to a disadvantaged position showed a negative association with HRQoL. In diseased respondents, pre-existing chronic comorbidity and experienced access to health care are key factors.

## Introduction

As COVID-19 spread throughout the United States (U.S.), New York emerged as the Nation's epicenter of the pandemic, initially having both the highest number of cases and deaths [1]. By April 2020, the COVID-19 incidence rate in New York City and New York was 497 and 293 per 100,000, respectively which was more than five times higher compared to the total U.S. [2]. The Government responded with highly stringent policy and public health measures to control the spread of COVID-19 in March and April 2020, including the closure of schools and non-essential businesses. While the impact of COVID-19, in terms of positive tests, hospitalizations, and deaths, on patients has been widely examined in the population, the impact on the United States general population has received less attention [3–5]. As a result of governmental public health and policy responses at the national and state levels, which include containment and closure policies, economic policies, health system policies and vaccine policies [6, 7], COVID-19 may be associated with psychological, social, and economic effects, and these effects may differ among subgroups based on determinants of health and the presence of chronic conditions [5]. Persons with chronic conditions are at higher risk for COVID-19 infection and adverse outcomes, including more serious illness and mortality [8]. In addition, frequency of foregone and delayed medical care was high during the first wave of the COVID-19 pandemic, which may have led to worsening of symptoms of chronic disease [9].

Since COVID-19 will continue to affect the U.S., perhaps for years to come, public health practitioners and policy makers should have the capacity to measure and track morbidity over time. In order to ensure both a preventive and supportive focus, surveillance should be implemented for both affected and unaffected persons as well as persons with and without chronic conditions. Understanding morbidity, including health-related quality of life (HRQoL), in addition to mortality enables the burden of disease due to COVID-19 to be calculated [10]. HRQoL reflects “how well a person functions in their life and his or her perceived wellbeing in physical, mental, and social domains of health” [11]. Over the past two decades, investigators increasingly have used one measure of HRQoL in general populations throughout the world: the EQ-5D [12, 13]. While investigators routinely have examined scores according to age, gender, and educational attainment [12, 13], the roles of other determinants of health, such as race/ethnicity and income have been examined less frequently. Furthermore, the relationship between factors of specific relevance to COVID-19's impact (even among those not infected), such as being an essential worker, loss of a job and/or health insurance, perceptions of preparedness for a disaster, and experienced access to care, tend not to be assessed. A study that investigated HRQoL during the COVID-19 pandemic in the US population and its determinants showed that age, income, race/ethnicity, marital status, having a chronic disease and COVID-19 were associated with HRQoL [14]. However, determinants including being an essential worker, loss of a job and/or health insurance, perceptions of preparedness for a disaster, and experienced access to care were not included in this study [14]. Nevertheless, these

factors may contribute to health inequalities. For example, being an essential worker, and working in lower paying jobs with minimal protection, if any, are associated with a greater risk of exposure to COVID-19 [15–17]. Additionally, lacking health insurance due to job loss has been associated with poor medication adherence or delayed COVID-19 treatment [18, 19]. Furthermore, population subgroups that vary with regard to race/ethnicity, income, and/or education, might differ with regard to level of general preparedness for a natural disaster such as a pandemic [20]. In a diverse sample of adults with chronic health conditions, Wolf and colleagues found that nearly one in three believed that they were only a little or not at all prepared for a COVID-19 outbreak, and only one in five believed that they were very prepared [21].

Although, to date, no published studies have examined HRQoL in New York during the COVID-19 pandemic, the effect of COVID-19 on mental health has been tracked at the state level over time [22]. Beginning on April 23, 2020, the National Center for Health Statistics and Census Bureau administered the Household Pulse Survey. The Household Pulse Survey is a weekly survey that collects information on the impact of COVID-19 on food security, health status, housing security, educational disruption, employment and mental health among a representative sample of more than 800,000 adult persons from the U.S. Between April 23 and May 5, 2020, New York State ranked first for depressive symptoms and second for anxiety symptoms [22].

The following investigation examines the HRQoL impact of the pandemic amongst residents of New York during a time that New York was the epicenter of the COVID-19 pandemic. We studied the effects for persons with and without pre-existing diseases separately, and explored the modifying role of age, gender, education and social position, employment, health insurance status, living situation, health risks such as smoking, and perceived access to care. The per-protocol hypotheses are as follows:

1. Respondents with a higher social position (based on race/ethnicity, income, and education) have better HRQoL as compared to respondents with a lower social position;
2. Respondents reporting more favourable employment and health insurance status and living situation (being employed, a nonessential worker, having health insurance, living alone, and/or having a higher level of disaster preparedness) have better HRQoL as compared to respondents in a less favourable situation;
3. Respondents who are non-smokers, have no chronic conditions, or report more positive access with their last health care visit, will have better HRQoL as compared to respondents who do not report these factors;
4. Respondents who are healthy will show a different relationship between the above determinants and HRQoL as compared to diseased respondents.

## Methods

### Study design

This study is a web-based cross-sectional study among a general population sample from New York (City and State). Ethical approval for this study was obtained from the Erasmus MC ethics review board (approval MEC-2020-0266). Respondents were recruited by a market research agency (Dynata) that distributed and launched the questionnaires. Study participants were members of the market research agency's existing voluntary panels and had provided written informed consent to participate in online surveys upon registration. An existing large Internet panel was used with samples designed to be representative of the New York City and

New York State (excluding New York City) populations for persons aged 18 to 75 with regard to age, gender, and level of education. Surveys were administered from April 22 to May 5, 2020. At the time that these study data were collected, the New York internet panel consisted of over 3000 persons. Respondents were recruited until the pre-defined quotas for age, gender, and education had been achieved. After completing the survey, participants received an incentive in the form of cash or points.

**Modifying factors.** The survey covered sociodemographic information, including area of residence (zip code), age, gender, race/ethnicity, household annual income level, highest level of education achieved, occupational status, essential worker status (yes/no), job loss as a result of COVID-19 (yes/no), health insurance, loss of insurance as a result of COVID-19 (yes/no), living situation, and smoking status. Twelve self-reported chronic conditions, which included respiratory diseases, heart disease, previous stroke, diabetes mellitus, hernia, (rheumatoid) arthritis, cancer and an open text field for any other conditions, were included as well as an item related to self-reported COVID-19 disease or exposure status. Having no chronic conditions and symptoms or exposure to COVID-19 was defined as 'healthy respondents,' whereas all other respondents were defined as 'diseased.' Household annual income was categorized into six groups while education was categorized into three groups. The International Standard Classification of Education (ISCED) was used to categorise educational level into low (primary school, lower secondary school or lower vocational training), middle (intermediate and higher secondary school, or intermediate vocational training, and high (higher vocational training or university education) [23]. Essential workers are defined as those persons who conduct operations or services in industries that are considered to be essential to ensure the continuity of critical functions in the U.S.

Disaster preparedness items were from an optional module of the Behavioral Risk Factor Surveillance System (BRFSS) [24]. The BRFSS is an annual surveillance survey that is administered by the Centers for Disease Control and Prevention (CDC). The BRFSS collects data by telephone in all 50 states, at state level, as well as the District of Columbia and three US territories and aims to monitor modifiable risk factors contributing to the leading causes of morbidity and mortality in the population. The responses on the items were added, and total scores ranged from 8 to 24. These responses were categorized into five levels: not prepared (total score 8–11), somewhat not prepared (12–14), somewhat prepared (15–17), somewhat well-prepared (18–20) and well-prepared (21–24).

### Primary health outcome measures

The survey included the EQ-5D-5L that includes five dimensions: mobility, self-care, usual activities, pain/discomfort, and anxiety/depression. Each dimension has five ordered response categories: no problems, slight problems, moderate problems, severe problems, and extreme/unable to. The EQ-5D-5L level sum score (LSS) is an equally weighted score calculated by summarizing the score on each of the five dimensions of EQ-5D-5L. The EQ-5D-5L level sum score ranges from 5 (best; if all domains have level 1) to 25 (worst; all domains have level 5). The EQ-5D-5L index was calculated using the recently published specific value set for U.S., and ranges from below 0 (worse than death) to 1 (best health) [25]. The EQ-5D measure also consists of a visual analogue scale (EQ VAS) for general health that ranges from 0 (worst imaginable health) to 100 (best imaginable health).

### Data analysis

A detailed analysis of non-responders was not possible due to the system of recruitment used. For the analysis of dropouts, specifically to compare the difference in the distribution in risk

factors between dropouts and completers in the study, analysis of variance (ANOVA) was used for continuous variables and Chi-square tests for categorical variables. Descriptive statistics assessed the sample characteristics by EQ outcomes, in addition to preparing determinant selection for regressions. Univariable and multivariable linear regression analysis estimated the association between the EQ outcomes and health determinants. Non-significant terms in the model were not excluded as they are of interest to our study. Likelihood ratio test was assessed for statistical significance. The significance level was set at 0.05. All analyses were carried out using R 3.6.3 [26].

## Results

### Sample

Three thousand forty eight persons agreed to participate. Of the 2684 (88%) respondents completing the questionnaire, 2657 (99%) respondents were included in our analysis. Compared to respondents, dropouts who did not complete the survey ( $n = 364$ ) were significantly younger and mostly female (S1 Table).

Of the respondents 1045 (39%) were living in New York City and 1612 (61%) in New York State, excluding New York City. Respondents had a mean age of 47.4 years (SD 15.5) and females comprised 55.1% of the sample (Table 1). The majority were non-Hispanic white (73.5%) and had a high educational level (82.6%). Job loss due to COVID-19 was frequently reported (24%). More than 30% of respondents were essential workers. Almost 20% of respondents reported that they (may) have been exposed to or infected by COVID-19. More than 44% of respondents reported having one or more chronic diseases.

### HRQoL

For all respondents, mean (SD) EQ-5D-5L index, LSS, and EQ VAS were 0.82(0.26), 7.5(3.4), and 79.3(17.4), respectively. Mean EQ outcome scores varied by levels of response in each characteristic category (Table 2). Almost every factor relating to a more disadvantaged position showed a worse score in HRQoL, except for age. Scores of HRQoL improved with higher age category. Non-Hispanic whites and non-Hispanic Asians had the best score in HRQoL compared to other racial/ethnic groups. Middle income groups had better scores in HRQoL compared to the other income groups.

In terms of EQ-5D-5L index and LSS, the respondents with no chronic conditions and age 65–75 had the best health (EQ-5D-5L index mean (SD) 0.91(0.18), 0.89(0.16), and LSS 6.4 (2.5), 6.7(2.2), respectively). Respondents who reported exposure to, or infection with, COVID-19 and respondents with four or more chronic conditions had the worst scores (EQ-5D-5L index mean (SD) 0.11(0.58) and 0.43(0.36); and LSS 16.1(7.2), and 12.5(4.1), respectively). Respondents with no chronic conditions and a very good experience with access to health care had the highest EQ VAS scores (mean (SD) 84.2 (13.9), and 83.1(16.0), respectively). Respondents with four or more chronic conditions and very bad access to health care had the worse VAS scores (mean (SD) 62.9(19.2) and 67.5(26.1), respectively). Compared to the other groups, respondents not infected with COVID-19 had the highest VAS scores.

Fig 1 presents the distribution of the five dimensions of the EQ-5D-5L according to three age groups. Overall, more respondents reported some problems in the dimension pain/discomfort and anxiety/depression than in any of the other three dimensions. A steep gradient was found in each dimension between age groups, except for pain/discomfort. Older people had a higher share of “no problems” in each dimension, except for pain/discomfort where “slight problems” was more prevalent.

Table 1. Characteristics of respondents.

| Determinants of health        | Characteristics                       | Frequency (%) (N = 2657) |
|-------------------------------|---------------------------------------|--------------------------|
| <b>Determinants of health</b> | <b>Age</b>                            |                          |
|                               | Median (IQR)                          | 48.0 (26.0)              |
|                               | <b>Age groups</b>                     |                          |
|                               | 18–24 yrs.                            | 188 (7.1%)               |
|                               | 25–34 yrs.                            | 465 (17.5%)              |
|                               | 35–44 yrs.                            | 527 (19.8%)              |
|                               | 45–54 yrs.                            | 527 (19.8%)              |
|                               | 55–64 yrs.                            | 472 (17.8%)              |
|                               | 65–75 yrs.                            | 478 (18.0%)              |
|                               | <b>Gender</b>                         |                          |
|                               | Male                                  | 1193 (44.9%)             |
| Female                        | 1464 (55.1%)                          |                          |
| <b>Social position</b>        | <b>Race/ethnicity</b>                 |                          |
|                               | Non-Hispanic White                    | 1953 (73.5%)             |
|                               | Non-Hispanic Black                    | 192 (7.2%)               |
|                               | Hispanic                              | 319 (12.0%)              |
|                               | Non-Hispanic Asian                    | 193 (7.3%)               |
|                               | <b>Level of education<sup>1</sup></b> |                          |
|                               | High                                  | 2196 (82.6%)             |
|                               | Middle                                | 359 (13.5%)              |
|                               | Low                                   | 102 (3.8%)               |
|                               | <b>Household income</b>               |                          |
|                               | Q5–richest ( $\geq 150,000$ \$)       | 472 (17.8%)              |
|                               | Q4–rich (100,000–149,999\$)           | 509 (19.2%)              |
|                               | Q3–middle (75,000–99,999\$)           | 398 (15.0%)              |
|                               | Q2–poor (50,000–74,999\$)             | 436 (16.4%)              |
|                               | Q1–poorest ( $\leq 49,999$ \$)        | 652 (24.5%)              |
|                               | Unwilling to tell                     | 190 (7.2%)               |
|                               | <b>Neighborhood/residency</b>         |                          |
|                               | Manhattan                             | 386 (14.5%)              |
|                               | Staten Island                         | 42 (1.6%)                |
|                               | Bronx                                 | 102 (3.8%)               |
| Brooklyn                      | 208 (7.8%)                            |                          |
| Queens                        | 307 (11.6%)                           |                          |
| NY State (other than NYC)     | 1612 (60.7%)                          |                          |

(Continued)

Table 1. (Continued)

| Determinants of health                                    | Characteristics                                 | Frequency (%) (N = 2657) |
|-----------------------------------------------------------|-------------------------------------------------|--------------------------|
| <i>Employment, living situation, and health insurance</i> | <b>Occupational status</b>                      |                          |
|                                                           | Employed                                        | 1448 (54.5%)             |
|                                                           | Unemployed1                                     | 525 (19.8%)              |
|                                                           | Retired                                         | 525 (19.8%)              |
|                                                           | Unable to work                                  | 159 (6.0%)               |
|                                                           | <b>Job loss in household due to COVID-19</b>    |                          |
|                                                           | No                                              | 2019 (76.0%)             |
|                                                           | Yes                                             | 638 (24.0%)              |
|                                                           | <b>Essential worker status</b>                  |                          |
|                                                           | Not essential worker <sup>3</sup>               | 1795 (67.6%)             |
|                                                           | Essential worker: male                          | 472 (17.8%)              |
|                                                           | Essential worker: female                        | 390 (14.7%)              |
|                                                           | <b>Living situation</b>                         |                          |
|                                                           | Living alone                                    | 605 (22.8%)              |
|                                                           | Living with partner and/or family               | 1950 (73.4%)             |
|                                                           | Other                                           | 102 (3.8%)               |
|                                                           | <b>Health insurance</b>                         |                          |
|                                                           | Yes                                             | 2429 (91.4%)             |
|                                                           | No                                              | 107 (4.0%)               |
|                                                           | Unknown                                         | 121 (4.6%)               |
|                                                           | <b>Loss of health insurance due to COVID-19</b> |                          |
|                                                           | No                                              | 2387 (89.8%)             |
|                                                           | Yes                                             | 270 (10.2%)              |
| <b>Disaster preparedness</b>                              |                                                 |                          |
| Well prepared (total score 8–11)                          | 1161 (43.7%)                                    |                          |
| Somewhat well prepared (total score 12–14)                | 828 (31.2%)                                     |                          |
| Somewhat prepared (total score 15–17)                     | 422 (15.9%)                                     |                          |
| Somewhat not prepared (total score 18–20)                 | 163 (6.1%)                                      |                          |
| Not prepared (total score 21–24)                          | 83 (3.1%)                                       |                          |
| <i>Exposures and conditions</i>                           | <b>Smoking status (including e-cigarettes)</b>  |                          |
|                                                           | Not at all                                      | 1838 (69.2%)             |
|                                                           | Some days                                       | 198 (7.5%)               |
|                                                           | Every day                                       | 321 (12.1%)              |
|                                                           | <b>Self-reported COVID-19 status</b>            |                          |
|                                                           | Not infected                                    | 2138 (80.5%)             |
|                                                           | May be infected                                 | 439 (16.5%)              |
|                                                           | Infected but recovered                          | 39 (1.5%)                |
|                                                           | Infected and not recovered                      | 41 (1.5%)                |
|                                                           | <b>Number of chronic conditions</b>             |                          |
|                                                           | 0                                               | 1481 (55.7%)             |
|                                                           | 1                                               | 753 (28.3%)              |
|                                                           | 2                                               | 265 (10.0%)              |
|                                                           | 3                                               | 94 (3.5%)                |
| 4 and more                                                | 64 (2.4%)                                       |                          |

(Continued)

Table 1. (Continued)

| Determinants of health | Characteristics                                                   | Frequency (%) (N = 2657) |
|------------------------|-------------------------------------------------------------------|--------------------------|
| Health care access     | <b>Expected access to health care</b>                             |                          |
|                        | Expect no difficulties to go                                      | 987 (37.1%)              |
|                        | Expect difficulties to go                                         | 999 (37.6%)              |
|                        | Don't expect to go because I'm afraid of COVID-19                 | 432 (16.3%)              |
|                        | Don't expect to go because I will not qualify to get appointments | 239 (9.0%)               |
|                        | <b>Last visit to health care (outpatient)</b>                     |                          |
|                        | More than 3 months ago                                            | 1533 (57.7%)             |
|                        | 1 to 4 weeks ago                                                  | 277 (10.4%)              |
|                        | About 1 to 3 months ago                                           | 700 (26.3%)              |
|                        | Last week                                                         | 147 (5.5%)               |
|                        | <b>Recall last healthcare visit, experience with access</b>       |                          |
|                        | Very good/Always good                                             | 1301 (49.0%)             |
|                        | Good/Usually good                                                 | 961 (36.2%)              |
|                        | Fair/Sometimes good                                               | 325 (12.2%)              |
|                        | Bad/Usually not good                                              | 50 (1.9%)                |
| Very bad/Never good    | 20 (0.8%)                                                         |                          |

<sup>1</sup> Education categories: High (ISCED 5 and above), Middle (ISCED 3–4), Low (ISCED 0–2).

<sup>2</sup> Including caregiver and student

<sup>3</sup> Non-essential worker status category includes also retired, unemployed, students and unable to work.

<https://doi.org/10.1371/journal.pone.0272252.t001>

**Regression analysis.** Table 3 reports the results of the exploratory analysis of the modifying role of determinants for the three EQ outcomes (EQ-5D-5L index, LSS, and EQ VAS) and healthy and diseased respondents separately. The EQ-5D-5L and LSS were linearly rescaled to range from 0 to 100 for easy comparison of the regression coefficients. The results with the EQ-5D-5L index serve as the point of departure. In the univariable analysis, almost all factors relating to a disadvantaged position showed the expected negative association with EQ-5D-5L index scores, except age, where being older benefitted HRQoL. Additionally, being non-Hispanic Asian, middle-educated, retired, or having a middle income was 'better.' People with chronic conditions and (very) bad access to health care had the most negative ('poorest') coefficients.

In the multivariable analysis for *healthy* respondents, only some factors showed a significant impact: race/ethnicity, level of education, living situation, disaster preparedness, smoking status, and access to healthcare. Being non-Hispanic Asian was the only factor that had positive (significant) impact. Low-educational attainment, not being prepared for a disaster, and very bad access to healthcare had the most negative impact. In the multivariable analysis for *diseased* respondents, all factors showed a significant impact with the exceptions of race/ethnicity, level of education, household income, residency, and job loss due to COVID-19. Only age and being somewhat well prepared for a disaster had a positive (significant) impact. Respondents who reported being unable to work, had three or more chronic conditions, and who reported (very) bad access to health care had the lowest coefficients.

*EQ VAS.* In the univariable analysis, results were close to that of the EQ-5D-5L index, except that the size of the coefficients was considerably lower with most factors. Worst off were those who were unable to work, were not prepared for a disaster, had three or more chronic conditions, and or had (very) bad access to health care.



Table 2. Mean (SD) EQ-5D-5L index, level sum score, and EQ VAS scores by respondent's characteristics.

|                                              | EQ-5D-5L index   | EQ-5D-5L level sum score | EQ VAS           |
|----------------------------------------------|------------------|--------------------------|------------------|
| <i>Characteristics</i>                       | <i>Mean (SD)</i> | <i>Mean (SD)</i>         | <i>Mean (SD)</i> |
| <b>Total</b>                                 | 0.82 (0.26)      | 7.5 (3.4)                | 79.3 (17.4)      |
| <b>Age groups</b>                            |                  |                          |                  |
| 18–24 yrs.                                   | 0.67 (0.33)      | 9.7 (4.3)                | 77.2 (21.0)      |
| 25–34 yrs.                                   | 0.77 (0.30)      | 8.2 (3.9)                | 78.2 (19.2)      |
| 35–44 yrs.                                   | 0.80 (0.29)      | 7.8 (3.8)                | 79.3 (18.1)      |
| 45–54 yrs.                                   | 0.84 (0.25)      | 7.3 (3.2)                | 79.0 (16.5)      |
| 55–64 yrs.                                   | 0.87 (0.21)      | 6.9 (2.7)                | 79.7 (16.2)      |
| 65–75 yrs.                                   | 0.89 (0.16)      | 6.7 (2.2)                | 81.2 (15.1)      |
| <b>Gender</b>                                |                  |                          |                  |
| Male                                         | 0.82 (0.28)      | 7.6 (3.7)                | 79.4 (16.9)      |
| Female                                       | 0.82 (0.24)      | 7.5 (3.2)                | 79.3 (17.8)      |
| <b>Race/ethnicity</b>                        |                  |                          |                  |
| Non-Hispanic White                           | 0.84 (0.24)      | 7.3 (3.2)                | 80.6 (16.0)      |
| Non-Hispanic Black                           | 0.76 (0.31)      | 8.3 (3.8)                | 76.5 (18.5)      |
| Hispanic                                     | 0.72 (0.32)      | 9.0 (4.2)                | 72.7 (23.3)      |
| Non-Hispanic Asian                           | 0.87 (0.22)      | 6.9 (3.0)                | 80.2 (15.9)      |
| <b>Level of education<sup>1</sup></b>        |                  |                          |                  |
| High                                         | 0.83 (0.26)      | 7.5 (3.4)                | 80.2 (16.4)      |
| Middle                                       | 0.83 (0.22)      | 7.4 (2.9)                | 77.4 (18.8)      |
| Low                                          | 0.66 (0.41)      | 9.6 (5.1)                | 67.4 (26.8)      |
| <b>Household income</b>                      |                  |                          |                  |
| Q5–richest ( $\geq 150,000$ \$)              | 0.82 (0.29)      | 7.5 (3.8)                | 82.4 (15.1)      |
| Q4–rich (100,000–149,999\$)                  | 0.85 (0.24)      | 7.2 (3.2)                | 82.7 (14.9)      |
| Q3–middle (75,000–99,999\$)                  | 0.85 (0.23)      | 7.3 (3.0)                | 79.8 (15.0)      |
| Q2–poor (50,000–74,999\$)                    | 0.84 (0.21)      | 7.4 (2.8)                | 79.1 (16.5)      |
| Q1–poorest ( $\leq 49,999$ \$)               | 0.76 (0.30)      | 8.3 (3.9)                | 73.8 (20.9)      |
| Unwilling to tell                            | 0.88 (0.21)      | 6.8 (2.8)                | 81.2 (18.1)      |
| <b>Neighborhood/residency</b>                |                  |                          |                  |
| Manhattan                                    | 0.78 (0.30)      | 8.1 (3.9)                | 80.6 (18.4)      |
| Staten Island                                | 0.83 (0.26)      | 7.3 (3.4)                | 78.7 (18.1)      |
| Bronx                                        | 0.74 (0.30)      | 8.7 (4.0)                | 75.2 (22.5)      |
| Brooklyn                                     | 0.81 (0.29)      | 7.8 (3.8)                | 77.8 (17.5)      |
| Queens                                       | 0.83 (0.25)      | 7.4 (3.3)                | 78.8 (17.7)      |
| NY State                                     | 0.84 (0.25)      | 7.4 (3.2)                | 79.6 (16.7)      |
| <b>Occupational status</b>                   |                  |                          |                  |
| Employed                                     | 0.85 (0.24)      | 7.1 (3.1)                | 81.5 (15.8)      |
| Unemployed <sup>2</sup>                      | 0.73 (0.31)      | 8.8 (4.0)                | 75.9 (18.7)      |
| Retired                                      | 0.89 (0.17)      | 6.7 (2.3)                | 80.4 (16.5)      |
| Unable to work                               | 0.62 (0.39)      | 10.0 (4.9)               | 67.8 (23.1)      |
| <b>Job loss in household due to COVID-19</b> |                  |                          |                  |
| No                                           | 0.85 (0.24)      | 7.2 (3.1)                | 79.8 (16.7)      |
| Yes                                          | 0.74 (0.32)      | 8.6 (4.1)                | 77.7 (19.4)      |
| <b>Essential worker status</b>               |                  |                          |                  |
| Not essential worker                         | 0.84 (0.23)      | 7.2 (3.1)                | 79.2 (16.9)      |
| Essential worker                             | 0.78 (0.31)      | 8.2 (4.0)                | 79.7 (18.5)      |

(Continued)

Table 2. (Continued)

|                                                                    | EQ-5D-5L index   | EQ-5D-5L level sum score | EQ VAS           |
|--------------------------------------------------------------------|------------------|--------------------------|------------------|
| <i>Characteristics</i>                                             | <i>Mean (SD)</i> | <i>Mean (SD)</i>         | <i>Mean (SD)</i> |
| <b><i>Living situation</i></b>                                     |                  |                          |                  |
| Living alone                                                       | 0.83 (0.27)      | 7.3 (3.4)                | 78.2 (18.7)      |
| Living with partner and/or family                                  | 0.82 (0.25)      | 7.5 (3.3)                | 79.9 (16.7)      |
| Other                                                              | 0.73 (0.38)      | 8.7 (4.9)                | 74.9 (20.8)      |
| <b><i>Health insurance</i></b>                                     |                  |                          |                  |
| Yes                                                                | 0.83 (0.25)      | 7.4 (3.2)                | 79.9 (16.7)      |
| No                                                                 | 0.70 (0.38)      | 9.1 (4.8)                | 74.7 (20.7)      |
| Unknown                                                            | 0.71 (0.39)      | 8.9 (4.9)                | 72.8 (24.2)      |
| <b><i>Loss of health insurance due to COVID-19</i></b>             |                  |                          |                  |
| No                                                                 | 0.85 (0.23)      | 7.2 (3.0)                | 79.9 (16.7)      |
| Yes                                                                | 0.59 (0.39)      | 10.7 (4.9)               | 73.9 (22.2)      |
| <b><i>Disaster preparedness</i></b>                                |                  |                          |                  |
| Well prepared                                                      | 0.84 (0.27)      | 7.2 (3.5)                | 82.7 (16.0)      |
| Somewhat well prepared                                             | 0.86 (0.18)      | 7.1 (2.4)                | 79.6 (15.7)      |
| Somewhat prepared                                                  | 0.77 (0.30)      | 8.3 (3.9)                | 74.4 (19.3)      |
| Somewhat not prepared                                              | 0.70 (0.30)      | 9.1 (3.9)                | 72.2 (18.8)      |
| Not prepared                                                       | 0.66 (0.40)      | 9.8 (5.3)                | 69.0 (24.3)      |
| <b><i>Smoking status (incl. e-cigarettes)</i></b>                  |                  |                          |                  |
| Not at all                                                         | 0.87 (0.21)      | 6.9 (2.8)                | 80.5 (16.4)      |
| Some days                                                          | 0.70 (0.30)      | 9.3 (3.9)                | 75.3 (21.3)      |
| Every day                                                          | 0.72 (0.34)      | 8.9 (4.4)                | 77.3 (18.2)      |
| <b><i>COVID-19 status</i></b>                                      |                  |                          |                  |
| Not infected                                                       | 0.87 (0.19)      | 6.8 (2.6)                | 81.0 (16.1)      |
| May be infected                                                    | 0.66 (0.30)      | 9.9 (4.0)                | 71.7 (20.4)      |
| Infected but recovered                                             | 0.55 (0.45)      | 10.9 (5.5)               | 74.9 (23.7)      |
| Infected and not recovered                                         | 0.11 (0.58)      | 16.1 (7.2)               | 79.9 (19.6)      |
| <b><i>Number of chronic conditions</i></b>                         |                  |                          |                  |
| 0                                                                  | 0.91 (0.18)      | 6.4 (2.5)                | 84.2 (13.9)      |
| 1                                                                  | 0.76 (0.29)      | 8.5 (3.8)                | 75.1 (18.5)      |
| 2                                                                  | 0.70 (0.29)      | 9.3 (3.6)                | 72.3 (19.2)      |
| 3                                                                  | 0.61 (0.33)      | 10.2 (3.8)               | 67.6 (22.0)      |
| 4 and more                                                         | 0.43 (0.36)      | 12.5 (4.1)               | 62.9 (19.2)      |
| <b><i>Expected access to health care</i></b>                       |                  |                          |                  |
| Expect no difficulties to go                                       | 0.82 (0.29)      | 7.6 (3.7)                | 81.7 (16.6)      |
| Expect difficulties to go                                          | 0.83 (0.23)      | 7.5 (3.1)                | 78.4 (16.6)      |
| Don't expect to go because I'm afraid of COVID-19                  | 0.81 (0.26)      | 7.6 (3.3)                | 76.0 (19.1)      |
| Don't expect to go because I will not qualify to get appointments  | 0.83 (0.29)      | 7.4 (3.9)                | 79.3 (19.4)      |
| <b><i>Recall last healthcare visit, experience with access</i></b> |                  |                          |                  |
| Very good/Always good                                              | 0.86 (0.24)      | 7.0 (3.1)                | 83.1 (16.0)      |
| Good/Usually good                                                  | 0.82 (0.23)      | 7.6 (3.1)                | 78.2 (16.2)      |
| Fair/Sometimes good                                                | 0.72 (0.31)      | 9.1 (4.2)                | 70.2 (19.8)      |
| Bad/Usually not good                                               | 0.57 (0.39)      | 10.9 (4.9)               | 66.8 (20.9)      |

(Continued)

Table 2. (Continued)

|                     | EQ-5D-5L index | EQ-5D-5L level sum score | EQ VAS      |
|---------------------|----------------|--------------------------|-------------|
| Characteristics     | Mean (SD)      | Mean (SD)                | Mean (SD)   |
| Very bad/Never good | 0.49 (0.52)    | 11.6 (6.4)               | 67.5 (26.1) |

<sup>1</sup> Education categories: High (ISCED 5 and above), Middle (ISCED 3–4), Low (ISCED 0–2).

<sup>2</sup> Including caregiver and student

<https://doi.org/10.1371/journal.pone.0272252.t002>

The multivariable analysis for *healthy* respondents showed a contributing impact for only a few factors: level of education, occupational status, job loss due to COVID-19, level of disaster preparedness, and experience with access to healthcare. High education and job loss had a positive (significant) impact. Not prepared for disaster and reporting fair to very bad access to healthcare had the worst impact. The multivariable analysis for *diseased* respondents showed distinctly different results with many significant factors. People with three or more chronic conditions and fair or bad access to health care had the lowest coefficients.

### Discussion

This investigation is the first to examine HRQoL for a representative sample of New Yorkers when New York was the epicenter of the COVID-19 pandemic; it also was the first to systematically reveal different patterns of impact on persons with and without (non-COVID-19-related) pre-existing morbidity. Differences in HRQoL are based on numerous factors, including individual characteristics, social position, occupational and health insurance status

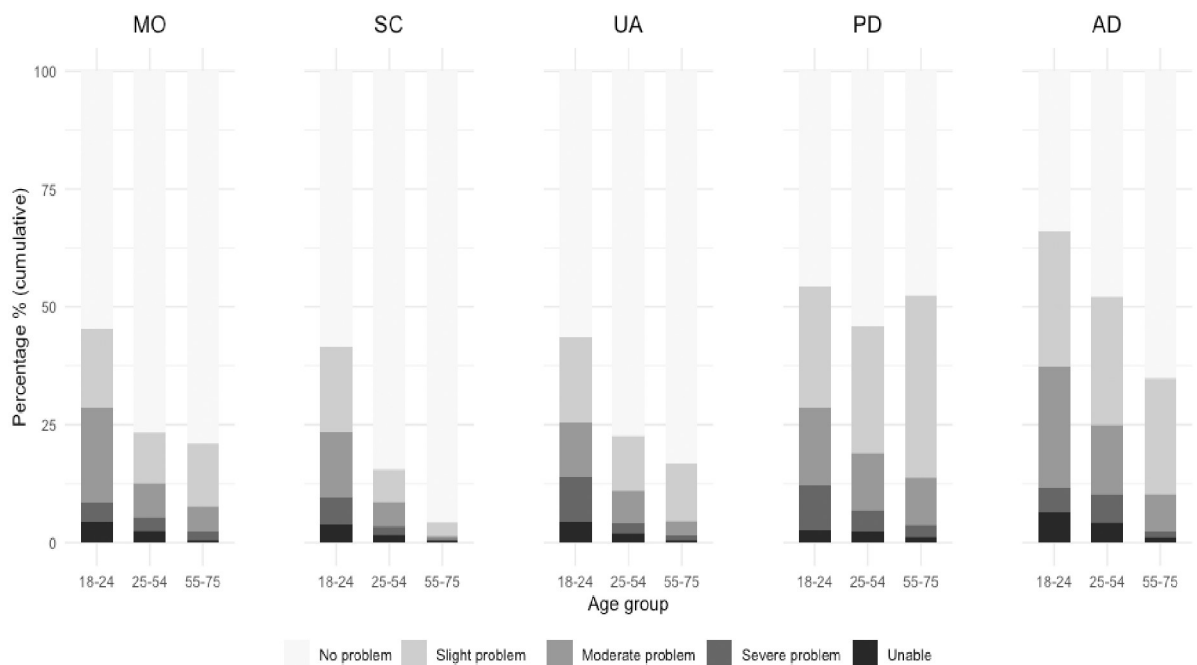

Fig 1. Distribution of EQ-5D-5L dimensions by age groups<sup>1</sup>. 1 MO, SC, UA, PD, and AD are short for the EQ-5D-5L dimensions: mobility, self-care, usual activity, pain/discomfort, anxiety/depression.

<https://doi.org/10.1371/journal.pone.0272252.g001>

Table 3. EQ-5D-5L index, level sum score, and EQ VAS, univariable and multivariable analysis in healthy and diseased respondents <sup>1,2</sup>.

|                                                 | Univariable analysis N = 2657 |                                       |                  | Multivariable analysis for Healthy respondents N = 2657 |                                       |                  | Multivariable for Diseased respondents N = 2657 |                                       |                  |
|-------------------------------------------------|-------------------------------|---------------------------------------|------------------|---------------------------------------------------------|---------------------------------------|------------------|-------------------------------------------------|---------------------------------------|------------------|
|                                                 | Scaled index <sup>3</sup>     | Rescaled level sum score <sup>4</sup> | VAS <sup>5</sup> | Scaled index <sup>3</sup>                               | Rescaled level sum score <sup>4</sup> | VAS <sup>5</sup> | Scaled index <sup>3</sup>                       | Rescaled level sum score <sup>3</sup> | VAS <sup>5</sup> |
|                                                 | Beta                          | Beta                                  | Beta             | Beta                                                    | Beta                                  | Beta             | Beta                                            | Beta                                  | Beta             |
| <b>Intercept</b>                                | /                             | /                                     | /                | 95.0                                                    | 96.1                                  | 89.8             | 91.5                                            | 93.8                                  | 91.7             |
| <b>Age group</b>                                | *                             | *                                     |                  |                                                         |                                       |                  | *                                               | *                                     |                  |
| 25–34 yrs.                                      | 10.4                          | 7.5                                   | 1.0              | 3.2                                                     | 2.5                                   | -3.7             | 4.8                                             | 3.7                                   | -1.3             |
| 35–44 yrs.                                      | 13.8                          | 9.5                                   | 2.1              | 3.8                                                     | 2.6                                   | -3.9             | 7.0                                             | 5.0                                   | -3.6             |
| 45–54 yrs.                                      | 17.4                          | 12.2                                  | 1.8              | 2.2                                                     | 1.8                                   | -4.9             | 9.2                                             | 6.4                                   | -3.4             |
| 55–64 yrs.                                      | 20.2                          | 13.9                                  | 2.5              | 3.0                                                     | 2.1                                   | -5.0             | 9.6                                             | 6.8                                   | -4.5             |
| 65–75 yrs.                                      | 22.5                          | 15.3                                  | 4.0              | 2.3                                                     | 1.7                                   | -5.0             | 12.3                                            | 8.4                                   | -1.2             |
| <b>Gender</b>                                   |                               |                                       |                  |                                                         |                                       |                  |                                                 |                                       |                  |
| Female                                          | 0.5                           | 0.1                                   | -0.1             | /                                                       | /                                     | /                | /                                               | /                                     | /                |
| <b>Race/ethnicity</b>                           | *                             | *                                     | *                | *                                                       | *                                     |                  |                                                 |                                       | *                |
| Non-Hispanic black                              | -8.2                          | -5.2                                  | -4.1             | -0.2                                                    | -0.3                                  | 1.4              | -1.0                                            | -0.1                                  | -2.7             |
| Hispanic                                        | -12.2                         | -8.2                                  | -7.9             | -2.4                                                    | -1.3                                  | -2.8             | 2.6                                             | 1.4                                   | -5.5             |
| Non-Hispanic asian                              | 3.1                           | 2.0                                   | -0.4             | 4.2                                                     | 3.0                                   | 0.2              | 5.0                                             | 2.8                                   | -0.4             |
| <b>Level of education</b>                       | *                             | *                                     | *                | *                                                       | *                                     | *                |                                                 |                                       | *                |
| High                                            | -0.6                          | -0.5                                  | 2.7              | -0.6                                                    | -0.4                                  | 2.1              | -4.0                                            | -2.7                                  | 0.1              |
| Low                                             | -17.7                         | -11.1                                 | -10.0            | -11.6                                                   | -7.2                                  | -6.8             | -5.9                                            | -3.3                                  | -6.3             |
| <b>Household income</b>                         | *                             | *                                     | *                |                                                         |                                       |                  |                                                 |                                       | *                |
| Q5–Richest                                      | -2.4                          | -1.2                                  | 2.6              | 0.8                                                     | 0.7                                   | 2.4              | -2.1                                            | -1.3                                  | 1.7              |
| Q4–Rich                                         | 0.3                           | 0.2                                   | 2.9              | 0.3                                                     | 0.3                                   | 1.4              | -3.3                                            | -1.7                                  | 1.9              |
| Q2–Poor                                         | -0.7                          | -0.6                                  | -0.7             | -0.5                                                    | 0.1                                   | 1.6              | -1.4                                            | -1.6                                  | -2.7             |
| Q1–Poorest                                      | -8.5                          | -5.3                                  | -6.0             | -1.3                                                    | -0.7                                  | -1.0             | -5.1                                            | -3.2                                  | -3.8             |
| Unwilling to tell                               | 3.2                           | 2.4                                   | 1.4              | -0.2                                                    | 0.1                                   | 1.5              | 0.7                                             | 0.7                                   | 0.3              |
| <b>Residency</b>                                | *                             | *                                     |                  |                                                         |                                       |                  |                                                 |                                       |                  |
| NY State                                        | 3.4                           | 2.4                                   | 0.7              | 1.3                                                     | 0.9                                   | 0.9              | 0.0                                             | 0.2                                   | -0.7             |
| <b>Occupational status</b>                      | *                             | *                                     | *                |                                                         |                                       | *                | *                                               | *                                     | *                |
| Unemployed                                      | -12.3                         | -8.6                                  | -5.5             | -0.5                                                    | -0.7                                  | -0.6             | -7.0                                            | -4.8                                  | -1.2             |
| Retired                                         | 3.2                           | 1.9                                   | -1.1             | -0.3                                                    | -0.5                                  | 1.3              | -5.6                                            | -4.1                                  | -5.0             |
| Unable to work                                  | -22.9                         | -14.6                                 | -13.7            | -3.1                                                    | -1.9                                  | -4.8             | -21.4                                           | -13.9                                 | -5.8             |
| <b>Job loss due to COVID-19</b>                 | *                             | *                                     | *                |                                                         |                                       | *                |                                                 |                                       |                  |
| Yes                                             | -10.3                         | -6.9                                  | -2.1             | 1.6                                                     | 0.9                                   | 1.9              | -1.8                                            | -0.9                                  | 1.1              |
| <b>Essential worker status</b>                  | *                             | *                                     |                  |                                                         |                                       |                  | *                                               | *                                     |                  |
| Essential worker                                | -6.9                          | -4.6                                  | 0.5              | -0.6                                                    | -0.6                                  | 1.4              | -4.4                                            | -2.9                                  | -0.1             |
| <b>Living situation</b>                         | *                             | *                                     | *                | *                                                       | *                                     |                  |                                                 |                                       |                  |
| Living with partner and/or family               | -1.1                          | -1.0                                  | 1.7              | -1.6                                                    | -1.1                                  | 0.2              | -2.0                                            | -1.8                                  | -0.6             |
| Other                                           | -10.4                         | -6.9                                  | -3.3             | -8.3                                                    | -5.8                                  | -1.5             | -8.5                                            | -5.4                                  | -2.3             |
| <b>Health insurance</b>                         | *                             | *                                     | *                |                                                         |                                       |                  | *                                               | *                                     |                  |
| No health insurance                             | -12.8                         | -8.2                                  | -5.1             | -3.1                                                    | -2.4                                  | -0.1             | -5.9                                            | -2.6                                  | 3.2              |
| Unknown                                         | -12.0                         | -7.3                                  | -7.1             | -1.9                                                    | -1.5                                  | -2.7             | -11.8                                           | -6.3                                  | -1.3             |
| <b>Loss of health insurance due to COVID-19</b> | *                             | *                                     | *                |                                                         |                                       |                  | *                                               | *                                     | *                |
| Yes                                             | -26.1                         | -17.7                                 | -6.1             | -1.7                                                    | -0.8                                  | -1.7             | -12.5                                           | -8.8                                  | -3.3             |
| <b>Disaster preparedness</b>                    | *                             | *                                     | *                | *                                                       | *                                     | *                | *                                               | *                                     | *                |
| Somewhat well prepared                          | -1.7                          | 0.7                                   | -3.0             | -1.5                                                    | -1.3                                  | -2.3             | 3.5                                             | 1.8                                   | -2.3             |
| Somewhat prepared                               | -7.7                          | -5.6                                  | -8.3             | -2.5                                                    | -2.2                                  | -3.8             | -2.0                                            | -1.8                                  | -5.6             |

(Continued)

Table 3. (Continued)

|                                                                   | Univariable analysis N = 2657 |                                       |                  | Multivariable analysis for Healthy respondents N = 2657 |                                       |                  | Multivariable for Diseased respondents N = 2657 |                                       |                  |
|-------------------------------------------------------------------|-------------------------------|---------------------------------------|------------------|---------------------------------------------------------|---------------------------------------|------------------|-------------------------------------------------|---------------------------------------|------------------|
|                                                                   | Scaled index <sup>3</sup>     | Rescaled level sum score <sup>4</sup> | VAS <sup>5</sup> | Scaled index <sup>3</sup>                               | Rescaled level sum score <sup>4</sup> | VAS <sup>5</sup> | Scaled index <sup>3</sup>                       | Rescaled level sum score <sup>3</sup> | VAS <sup>5</sup> |
|                                                                   | Beta                          | Beta                                  | Beta             | Beta                                                    | Beta                                  | Beta             | Beta                                            | Beta                                  | Beta             |
| Somewhat not prepared                                             | -14.1                         | -9.6                                  | -10.4            | -0.3                                                    | -0.7                                  | -3.2             | -5.6                                            | -3.9                                  | -4.6             |
| Not prepared                                                      | -18.8                         | -12.8                                 | -13.7            | -6.6                                                    | -4.6                                  | -11.6            | -8.2                                            | -6.0                                  | -6.0             |
| <b>Smoking status (including e-cigarettes)</b>                    | *                             | *                                     | *                | *                                                       | *                                     | *                | *                                               | *                                     | *                |
| Some days                                                         | -16.7                         | -11.9                                 | -5.2             | -3.7                                                    | -3.2                                  | 0.0              | -7.5                                            | -5.6                                  | -2.7             |
| Every day                                                         | -14.9                         | -9.8                                  | -3.2             | -0.7                                                    | -0.2                                  | -1.0             | -6.3                                            | -4.1                                  | 0.0              |
| <b>Number of chronic conditions</b>                               | *                             | *                                     | *                |                                                         |                                       |                  | *                                               | *                                     | *                |
| 1                                                                 | -15.0                         | -10.5                                 | -9.2             | /                                                       | /                                     | /                | -1.6                                            | -1.3                                  | -3.3             |
| 2                                                                 | -21.3                         | -14.6                                 | -12.0            | /                                                       | /                                     | /                | -8.9                                            | -6.1                                  | -6.0             |
| 3                                                                 | -29.7                         | -19.3                                 | -16.7            | /                                                       | /                                     | /                | -14.7                                           | -9.1                                  | -10.9            |
| 4 and more                                                        | -47.9                         | -30.9                                 | -21.3            | /                                                       | /                                     | /                | -27.0                                           | -16.9                                 | -12.4            |
| <b>Expected access to health care</b>                             |                               |                                       | *                |                                                         |                                       |                  |                                                 |                                       |                  |
| Expect difficulties to go                                         | 1.0                           | 0.1                                   | -3.2             | /                                                       | /                                     | /                | /                                               | /                                     | /                |
| Don't expect to go because I'm afraid of COVID-19                 | -0.3                          | -0.4                                  | -5.6             | /                                                       | /                                     | /                | /                                               | /                                     | /                |
| Don't expect to go because I will not qualify to get appointments | 1.3                           | 0.6                                   | -2.4             | /                                                       | /                                     | /                | /                                               | /                                     | /                |
| <b>Recall last healthcare visit, experience with access</b>       | *                             | *                                     | *                | *                                                       | *                                     | *                | *                                               | *                                     | *                |
| Good/Usually good                                                 | -4.2                          | -3.1                                  | -4.9             | -1.4                                                    | -1.2                                  | -3.0             | -2.6                                            | -2.1                                  | -4.8             |
| Fair/Sometimes good                                               | -14.9                         | -10.6                                 | -12.9            | -4.9                                                    | -3.1                                  | -7.8             | -8.6                                            | -6.7                                  | -9.9             |
| Bad/Usually not good                                              | -29.9                         | -19.9                                 | -16.3            | -1.6                                                    | -1.3                                  | -2.4             | -22.7                                           | -15.1                                 | -12.9            |
| Very bad/Never good                                               | -37.1                         | -23.0                                 | -15.6            | -8.2                                                    | -4.2                                  | -15.6            | -28.3                                           | -16.8                                 | -5.4             |

Reference group in each analysis: age 18–24 yrs., male, middle-educated, middle annual household income (\$75,000–99,999), resides in New York City, employed, no job loss due to COVID-19, not essential worker, living alone, has health insurance, no insurance loss due to COVID-19, well prepared for disaster, non-smoker, not infected with COVID-19, no chronic conditions, expected access to health care as used to, experience with access is very good/always good.

“\*” represents significance (p value<0.05).

For the univariable analysis, intercepts were not shown in the table, therefore beta coefficients of intercepts were marked with ‘/’. For the multivariable analysis, several determinants were not included in specific models (gender, number of chronic conditions, and expected access to health care), and, therefore, the beta coefficients of these determinants were marked with ‘/’.

The outcomes are (re)scaled to a 0 to 100 scale to allow for an easy comparison of beta coefficients among outcomes, although this may make the beta coefficients less directly interpretable.

- <sup>1</sup>Healthy respondents are those who reported no chronic conditions and not infected with COVID-19
- <sup>2</sup>Diseased respondents are those who reported one or more chronic condition(s) and/nor (possibly) infected with COVID-19
- <sup>3</sup>Scaled index is scaled as 100 times index to allow comparison with the rescaled level sum score and VAS
- <sup>4</sup>Rescaled level sum score is rescaled as 125 times (5 times level sum score) to allow comparison with the scaled index and VAS
- <sup>5</sup>VAS refers to “visual analogue score” to allow comparison with the scaled index and rescaled level sum score

<https://doi.org/10.1371/journal.pone.0272252.t003>

and living situation, exposures and chronic conditions, and access to healthcare. Generally, the negative impact of the pandemic is amplified in diseased persons, as data suggest in part through limited health care access.

With regard to our first hypothesis, while scores tended to differ between categories of race/ethnicity and income for the univariable analysis, the magnitude of these differences was relatively small as compared to other factors examined for the multivariable analysis. By contrast,

other investigators have noted an association between lower income and lower EQ-5D scores in the U.S. general population [27–29]. Perhaps the slightly lower scores amongst the most affluent groups represents the inability to control life circumstances and the reduced social participation due to social distancing measures that had been implemented [30]. The reduction or lack of a difference in EQ-5D scores by race/ethnicity, after adjustment for socioeconomic status, has been previously noted [27, 28, 31]. For education, compared to diseased respondents, healthy respondents in the lowest category of educational attainment had greater impairments in EQ-5D-5L scores, but the same magnitude of impairment was noted for healthy and diseased respondents for the EQ VAS. This indicates that the impact of education on the EQ-5D-5L was nullified by having one or more chronic conditions.

Our second hypothesis was confirmed by the difference in patterns of EQ-5D scores in the predicted direction with respect to favourable occupational and insurance status, living situation, and level of disaster preparedness. As noted in Table 3, the magnitude of the difference of EQ-5D-5L index and LSS was larger for these factors than for race/ethnicity and income. Similar to education, the relative magnitude of these relationships for the EQ-5D-5L index and LSS differed according to if respondents were healthy or diseased. Lower scores for unemployed persons are consistent with Solomou & Constantinidou [32] who reported that unemployed persons had higher symptoms of depression and anxiety during COVID-19. In terms of living situation, respondents living with nonfamily roommates may experience a greater feeling of instability and susceptibility [33]. Additionally, the finding that lower levels of disaster preparedness were associated with worse HRQoL aligns with the work of Strine and colleagues [24]. The variation in EQ-5D-5L index and LSS between different categories of occupational status and loss of health insurance tended to be greater for diseased versus healthy respondents, especially for diseased respondents unable to work. Regarding possible explanations, employment and health insurance may serve as markers to access to care, and, as such, are more critical to persons with chronic diseases [18]. Therefore, HRQoL may be lower due to lack of access to medical care [34]. Of note, EQ VAS scores did not show the same patterns of having a more pronounced change with these factors or differing according to being healthy or diseased.

Our third hypotheses proved to be correct. Persons who reported smoking, chronic conditions, and recalling more difficulty with accessing healthcare had worse EQ-5D scores as compared to those who did not. Overall, these differences tended to have the greatest magnitude compared to individual characteristics (hypothesis 1) or occupational or living situation (except for being unable to work) (hypothesis 2), and diseased respondents who smoked and had worse access to care were more adversely impacted than healthy respondents ('amplification'). Scores on EQ outcomes declined with each additional chronic condition. This finding also has been noted by other investigators [27], and persons with two or more chronic conditions may avoid both urgent or emergency and routine medical care because of concerns over COVID-19 [35]. Similarly, EQ-5D scores tended to decline with worse experienced access to care, with EQ-5D-5L index and LSS showing a more marked decrease in diseased versus healthy respondents. These findings may indicate a more urgent need for accessible health care in the diseased respondents.

Our results that middle-aged and older persons tended to have higher EQ-5D-5L index and LSS compared to younger persons were unexpected and differ from the published literature [27, 36]. Such findings may be due to the disproportionate adverse effect of COVID-19 on younger persons. In terms of dimensions most affected, persons aged 18–24 reported not only more problems in anxiety/depression, but also in the other four dimensions. In their online survey of adults, Smith and colleagues [37] found that the youngest age group (18–24 year olds) had the worst mental health. During the time that our survey was administered, the

frequency of depressive and anxiety symptoms in New York residents was 28.7% and 36.1%, respectively, with this percentage decreasing according to increasing age category [22]. This phenomenon may be related to response behaviour and response shift. Older respondents may respond in an age comparative manner, meaning responding relatively to others of a similar age, while younger respondents might experience and express concepts of HRQoL in a slightly different manner than older respondents [38]. We currently do not have a satisfactory explanation for the finding that this effect is even more pronounced in the diseased respondents. There are more than 30 population datasets in many countries of the world before COVID, with data from persons from the general population aged 18 years and older. None of these studies shows any indication of different understanding of the questions compared to elderly persons [13].

Understanding the general population HRQoL scores during COVID-19 is critical, given that the entire population is at risk for COVID-19 and different demographic subgroups will be affected in different ways. COVID-19 also has disrupted many segments of the economy, in addition to education and social relationships, and the chronic medical complications of COVID-19 are largely unknown [39]. Members of a given subgroup may experience different outcomes based on policies implemented at the local and state level. Capturing COVID-19's effect in terms of both HRQoL (morbidity) and mortality is essential to estimating summary measures of population health such as quality-adjusted life years or disability-adjusted life years [40, 41].

Our investigation has several limitations. First, the data collection agency administered this survey only in English using an existing large Internet panel representative of the New York City and State (excluding NYC) populations. As a result, we cannot rule out selection bias, despite representativeness measures taken [42]. Second, while we combined the data from participants living in New York City ( $n = 1045$ ) and New York State ( $n = 1612$ ), these two participant groups may differ according to sociodemographic characteristics. Third, analyses were cross-sectional. Fourth, COVID-19-exposure and symptoms, risk factors for COVID-19 related complications, and chronic conditions were self-reported. Nevertheless, all condition-outcome relations satisfied clinical wisdom.

In conclusion, our results highlight the differential effect of a range of factors on HRQoL for New Yorkers when New York was the epicenter of the COVID-19 pandemic. Additional research should examine the relationship between mental health and scores of HRQoL among younger persons as well as how EQ-5D scores, and the specific dimensions affected, may change over time. Furthermore, as more and more New Yorkers have contracted COVID-19 and are experiencing long-term health effects, examining HRQoL over time amongst those patients will provide complementary information and, ultimately, enable the total burden of disease due to COVID-19 to be assessed.

## Supporting information

**S1 Table. Distribution of age, gender, level of education, and residency among dropouts and completers.**

(DOCX)

**S2 Table. Multivariable analysis of all respondents rescaled.**

(DOCX)

**S3 Table. Mean (SD) EQ-5D-5L index, level sum score, and EQ VAS scores by respondent's characteristics.**

(DOCX)

**S4 Table. EQ-5D-5L, level sum score, and EQ VAS, univariable and multivariable analysis in healthy and diseased respondents.**

(DOCX)

**Author Contributions****Conceptualization:** Erica I. Lubetkin, Juanita A. Haagsma, Gouke J. Bonsel.**Data curation:** Di Long, Mathieu F. Janssen.**Formal analysis:** Di Long, Juanita A. Haagsma, Mathieu F. Janssen, Gouke J. Bonsel.**Funding acquisition:** Juanita A. Haagsma, Gouke J. Bonsel.**Investigation:** Juanita A. Haagsma.**Methodology:** Juanita A. Haagsma, Gouke J. Bonsel.**Software:** Di Long, Mathieu F. Janssen.**Supervision:** Juanita A. Haagsma, Gouke J. Bonsel.**Validation:** Di Long, Juanita A. Haagsma, Mathieu F. Janssen.**Writing – original draft:** Erica I. Lubetkin, Di Long, Juanita A. Haagsma, Mathieu F. Janssen, Gouke J. Bonsel.**Writing – review & editing:** Erica I. Lubetkin, Juanita A. Haagsma, Gouke J. Bonsel.**References**

1. Dorn AV, Cooney RE, Sabin ML. COVID-19 exacerbating inequalities in the US. *Lancet*. 2020 Apr 18; 395(10232):1243–1244. [https://doi.org/10.1016/S0140-6736\(20\)30893-X](https://doi.org/10.1016/S0140-6736(20)30893-X) PMID: 32305087
2. CDC COVID-19 Response Team. Geographic Differences in COVID-19 Cases, Deaths, and Incidence—United States, February 12–April 7, 2020. *MMWR Morb Mortal Wkly Rep*. 2020; 69(15):465–471. Published 2020 Apr 17. <https://doi.org/10.15585/mmwr.mm6915e4> Available: <https://www.ncbi.nlm.nih.gov/pmc/articles/PMC7755058/> PMID: 32298250
3. Bassett MT, Chen JT, Krieger N. Variation in racial/ethnic disparities in COVID-19 mortality by age in the United States: A cross-sectional study. *PLoS Med*. 2020 Oct 20; 17(10):e1003402. Erratum in: *PLoS Med*. 2021 Feb 4; 18(2):e1003541. <https://doi.org/10.1371/journal.pmed.1003402> PMID: 33079941
4. Woolf SH, Chapman DA, Sabo RT, Weinberger DM, Hill L. Excess Deaths From COVID-19 and Other Causes, March–April 2020. *JAMA*. 2020 Aug 4; 324(5):510–513. <https://doi.org/10.1001/jama.2020.11787> PMID: 32609307
5. Bamba C, Riordan R, Ford J, Matthews F. The COVID-19 pandemic and health inequalities. *J Epidemiol Community Health*. 2020 Nov; 74(11):964–968. Epub 2020 Jun 13. <https://doi.org/10.1136/jech-2020-214401> PMID: 32535550
6. Hale, Thomas, Noam Angrist, Emily Cameron-Blake, Laura Hallas, Beatriz Kira, Saptarshi Majumdar, et al. “Variation in Government Responses to COVID-19” Version 7.0. Blavatnik School of Government Working Paper. May 25, 2020. [www.bsg.ox.ac.uk/covidtracker](http://www.bsg.ox.ac.uk/covidtracker)
7. Faghani A, Hughes MC, Vaezi M. Association of anti-contagion policies with the spread of COVID-19 in United States. *J Public Health Res*. 2022 Mar 25; 11(2):2748. <https://doi.org/10.4081/jphr.2022.2748> PMID: 35332753
8. Richardson S, Hirsch JS, Narasimhan M, et al. Presenting Characteristics, Comorbidities, and Outcomes Among 5700 Patients Hospitalized With COVID-19 in the New York City Area. *JAMA*. 2020 May 26; 323(20):2052–2059. Erratum in: *JAMA*. 2020 May 26; 323(20):2098. <https://doi.org/10.1001/jama.2020.6775> PMID: 32320003
9. Giannouchos TV, Brooks JM, Andreyeva E, Ukert B. Frequency and factors associated with foregone and delayed medical care due to COVID-19 among nonelderly US adults from August to December 2020. *J Eval Clin Pract*. 2022 Feb; 28(1):33–42. Epub 2021 Dec 15. <https://doi.org/10.1111/jep.13645> PMID: 34910347



10. Institute of Medicine (US) Committee on Summary Measures of Population Health. Summarizing Population Health: Directions for the Development and Application of Population Metrics. Field MJ, Gold MR, editors. Washington (DC): National Academies Press (US), 1998. <https://doi.org/10.17226/6124> PMID: [25101456](https://pubmed.ncbi.nlm.nih.gov/25101456/)
11. Stenman U, Hakama M, Knekt P, et al. Measurement and modeling of health-related quality of life. *Epidem Demog Public Health* 2010; 195.
12. Janssen MF, Szende A, Cabases J, Ramos-Goñi JM, Vilagut G, König HH. Population norms for the EQ-5D-3L: a cross-country analysis of population surveys for 20 countries. *Eur J Health Econ*. 2019 Mar; 20(2):205–216. Epub 2018 Feb 14. <https://doi.org/10.1007/s10198-018-0955-5> PMID: [29445941](https://pubmed.ncbi.nlm.nih.gov/29445941/)
13. Szende A, Janssen B, Cabases J (Eds.). Self-reported population health: An international perspective based on EQ-5D. London: Springer Open; 2014.
14. Hay JW, Gong CL, Jiao X, Zawadzki NK, Zawadzki RS, Pickard AS, et al. A US Population Health Survey on the Impact of COVID-19 Using the EQ-5D-5L. *J Gen Intern Med*. 2021 May; 36(5):1292–1301. Epub 2021 Mar 8. <https://doi.org/10.1007/s11606-021-06674-z> PMID: [33686587](https://pubmed.ncbi.nlm.nih.gov/33686587/)
15. Hawkins D. Differential occupational risk for COVID-19 and other infection exposure according to race and ethnicity. *Am J Ind Med*. 2020 Sep; 63(9):817–820. Epub 2020 Jun 15. <https://doi.org/10.1002/ajim.23145> PMID: [32539166](https://pubmed.ncbi.nlm.nih.gov/32539166/)
16. Kearney, A., & Muñana C. Taking Stock of Essential Workers. Kaiser Family Foundation, <https://www.kff.org/coronavirus-policy-watch/taking-stock-of-essential-workers/>; accessed on 21 January 2022.
17. Lancet The. The plight of essential workers during the COVID-19 pandemic. *Lancet*. 2020 May 23; 395(10237):1587. [https://doi.org/10.1016/S0140-6736\(20\)31200-9](https://doi.org/10.1016/S0140-6736(20)31200-9) PMID: [32446399](https://pubmed.ncbi.nlm.nih.gov/32446399/)
18. Kolmes S. Employment-Based, For-Profit Health Care in a Pandemic. *Hastings Cent Rep*. 2020 May; 50(3):22. <https://doi.org/10.1002/hast.1126> PMID: [32596914](https://pubmed.ncbi.nlm.nih.gov/32596914/)
19. Mojtabei R. Insurance Loss in the Era of the Affordable Care Act: Association With Access to Health Services. *Med Care*. 2019 Aug; 57(8):567–573. <https://doi.org/10.1097/MLR.0000000000001150> PMID: [31299024](https://pubmed.ncbi.nlm.nih.gov/31299024/)
20. Gazibara T, Jia H, Lubetkin EI. Disaster preparedness: a comparative study of North Carolina and Montana. *Disaster Med Public Health Prep*. 2014 Jun; 8(3):239–242. Epub 2014 May 20. <https://doi.org/10.1017/dmp.2014.38> PMID: [24846394](https://pubmed.ncbi.nlm.nih.gov/24846394/)
21. Wolf MS, Serper M, Opsasnick L, et al. Awareness, Attitudes, and Actions Related to COVID-19 Among Adults With Chronic Conditions at the Onset of the U.S. Outbreak: A Cross-sectional Survey. *Ann Intern Med*. 2020; Jul 21; 173(2):100–109. Epub 2020 Apr 9. <https://doi.org/10.7326/M20-1239> PMID: [32271861](https://pubmed.ncbi.nlm.nih.gov/32271861/)
22. Centers for Disease Control and Prevention. National Center for Health Statistics. Health Care Access, Telemedicine, and Mental Health. <https://www.cdc.gov/nchs/covid19/health-care-access-and-mental-health.htm>; accessed on 21 January 2022.
23. Isced U. *United Nations Educational, Scientific and Cultural Organization (UNESCO)* 2011. International standard classification of education.
24. Strine TW, Neff LJ, Crawford S. Health-related quality of life domains and household preparedness for public health emergencies: Behavioral Risk Factor Surveillance System, 2006–2010. *Disaster Med Public Health Prep*. 2013 Apr; 7(2):191–200. <https://doi.org/10.1017/dmp.2013.23> PMID: [24618171](https://pubmed.ncbi.nlm.nih.gov/24618171/)
25. Pickard AS, Law EH, Jiang R, et al. United States Valuation of EQ-5D-5L Health States Using an International Protocol. *Value Health*. 2019 Aug; 22(8):931–941. Epub 2019 May 25. <https://doi.org/10.1016/j.jval.2019.02.009> PMID: [31426935](https://pubmed.ncbi.nlm.nih.gov/31426935/)
26. R Core Team (2013). R: A language and environment for statistical computing. R Foundation for Statistical Computing, Vienna, Austria. URL <http://www.R-project.org/>.
27. Lubetkin EI, Jia H, Franks P, Gold MR. Relationship among sociodemographic factors, clinical conditions, and health-related quality of life: examining the EQ-5D in the U.S. general population. *Qual Life Res*. 2005 Dec; 14(10):2187–96. <https://doi.org/10.1007/s11136-005-8028-5> PMID: [16328899](https://pubmed.ncbi.nlm.nih.gov/16328899/)
28. Luo N, Johnson JA, Shaw JW, Feeny D, Coons SJ. Self-reported health status of the general adult U.S. population as assessed by the EQ-5D and Health Utilities Index. *Med Care*. 2005 Nov; 43(11):1078–86. <https://doi.org/10.1097/01.mlr.0000182493.57090.c1> PMID: [16224300](https://pubmed.ncbi.nlm.nih.gov/16224300/)
29. Cha AS, Law EH, Shaw JW, Pickard AS. A comparison of self-rated health using EQ-5D VAS in the United States in 2002 and 2017. *Qual Life Res*. 2019 Nov; 28(11):3065–3069. Epub 2019 Jul 18. <https://doi.org/10.1007/s11136-019-02249-y> PMID: [31321671](https://pubmed.ncbi.nlm.nih.gov/31321671/)
30. Marmot M. The influence of income on health: views of an epidemiologist. *Health Aff (Millwood)*. 2002 Mar-Apr; 21(2):31–46. <https://doi.org/10.1377/hlthaff.21.2.31> PMID: [11900185](https://pubmed.ncbi.nlm.nih.gov/11900185/)

31. Pereira CC, Palta M, Mullahy J, Fryback DG. Race and preference-based health-related quality of life measures in the United States. *Qual Life Res*. 2011 Aug; 20(6):969–78. Epub 2010 Dec 23. <https://doi.org/10.1007/s11136-010-9813-3> PMID: 21181447
32. Solomou I, Constantinidou F. Prevalence and Predictors of Anxiety and Depression Symptoms during the COVID-19 Pandemic and Compliance with Precautionary Measures: Age and Sex Matter. *Int J Environ Res Public Health*. 2020 Jul 8; 17(14):4924. <https://doi.org/10.3390/ijerph17144924> PMID: 32650522
33. Germani A, Buratta L, Delvecchio E, Mazzeschi C. Emerging Adults and COVID-19: The Role of Individualism-Collectivism on Perceived Risks and Psychological Maladjustment. *Int J Environ Res Public Health*. 2020 May 17; 17(10):3497. <https://doi.org/10.3390/ijerph17103497> PMID: 32429536
34. Bryson WJ. Long-term health-related quality of life concerns related to the COVID-19 pandemic: a call to action. *Qual Life Res*. 2021 Mar; 30(3):643–645. Epub 2020 Oct 18. <https://doi.org/10.1007/s11136-020-02677-1> PMID: 33073307
35. Czeisler MÉ, Marynak K, Clarke KEN, et al. Delay or Avoidance of Medical Care Because of COVID-19-Related Concerns—United States, June 2020. *MMWR Morbidity and Mortality Weekly Report*. 2020; 69(36):1250–1257. <https://doi.org/10.15585/mmwr.mm6936a4> PMID: 32915166
36. Janssen MF, Pickard AS, Golicki D, et al. Measurement properties of the EQ-5D-5L compared to the EQ-5D-3L across eight patient groups: a multi-country study. *Qual Life Res*. 2013 Sep; 22(7):1717–27. Epub 2012 Nov 25. <https://doi.org/10.1007/s11136-012-0322-4> PMID: 23184421
37. Smith L, Jacob L, Yakkundi A, et al. Correlates of symptoms of anxiety and depression and mental well-being associated with COVID-19: a cross-sectional study of UK-based respondents. *Psychiatry Res*. 2020 Sep; 291:113138. Epub 2020 May 29. <https://doi.org/10.1016/j.psychres.2020.113138> PMID: 32562931
38. Sprangers MA, Schwartz CE. Integrating response shift into health-related quality of life research: a theoretical model. *Soc Sci Med*. 1999 Jun; 48(11):1507–15. [https://doi.org/10.1016/s0277-9536\(99\)00045-3](https://doi.org/10.1016/s0277-9536(99)00045-3) PMID: 10400253
39. Carfi A, Bernabei R, Landi F; Gemelli Against COVID-19 Post-Acute Care Study Group. Persistent Symptoms in Patients After Acute COVID-19. *JAMA*. 2020 Aug 11; 324(6):603–605. <https://doi.org/10.1001/jama.2020.12603> PMID: 32644129
40. Murray CJL, Lopez AD. The Global Burden of Disease: A comprehensive assessment of mortality and disability from diseases, injuries and risk factors in 1990 and projected to 2020. 1996, Cambridge, MA: Harvard University Press on behalf of the World Health Organization and the World Bank.
41. Gold MR, Siegel JE, Russel LB, Weinstein MC, eds. Cost-effectiveness in Health and Medicine. New York: Oxford University Press, 1996.
42. Jiang R, Janssen MFB, Pickard AS. US population norms for the EQ-5D-5L and comparison of norms from face-to-face and online samples. *Qual Life Res*. 2021 Mar; 30(3):803–816. Epub 2020 Oct 6. <https://doi.org/10.1007/s11136-020-02650-y> PMID: 33025373
